# Supplementary material
Source: Springer Nature journal article supplement (https://www.springermedizin.de/resource/supplementary/12890_2011_274_MOESM3_ESM.pdf/9504842)

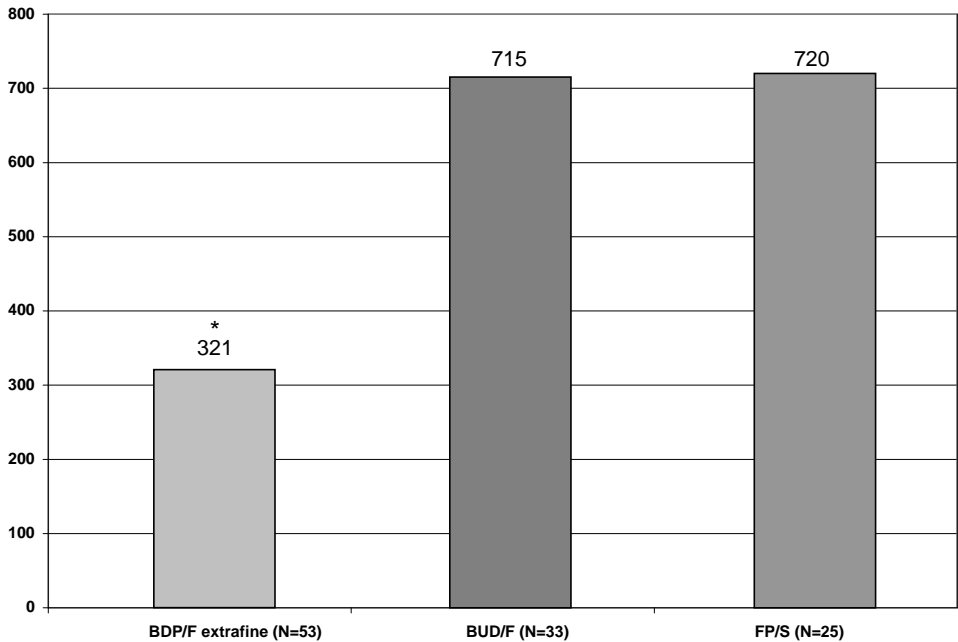

Supplement: MOESM3 [file 9504842]
